# Supplementary material for: Blue emissive dimethylmethylene-bridged triphenylamine derivatives appending cross-linkable groups
Source: Royal Society of Chemistry journal article supplement (doi:10.1039/d0ob00622j), 2020-01-01
Supplement: d0ob00622j1.pdf [file d0ob00622j1.pdf]

Supporting Information for  
**Blue emissive dimethylmethylen-bridged triphenylamine  
derivatives appending cross-linkable groups**

Kangyu Zhou, Hongfei Pan, Yongjie Zhang, Houchen Wang, Xiaofei Dong, Xiangkui Ren,  
Xianggao Li, Shirong Wang\*, and Zhijian Chen\*

*School of Chemical Engineering and Technology, Collaborative Innovation Center of Chemical  
Science and Engineering, Tianjin University, Tianjin 300072, China. E-mail: zjchen@tju.edu.cn;  
wangshirong@tju.edu.cn*

**Table of Contents**

|                                                                                                   |     |
|---------------------------------------------------------------------------------------------------|-----|
| 1. $^1\text{H}$ and $^{13}\text{C}$ NMR Spectra .....                                             | S1  |
| 2. UV/vis absorption and fluorescence spectra of <b>4a</b> in different solvents.....             | S11 |
| 3. Fluorescence decay curve of <b>1</b> and <b>4a–e</b> in $\text{CH}_2\text{Cl}_2$ solution..... | S12 |
| 4. UV/vis absorption spectra of <b>1</b> and <b>4a–e</b> in thin films.....                       | S13 |
| 5. Fluorescence decay curve of <b>1</b> and <b>4a–e</b> in thin films.....                        | S14 |
| 6. Cyclic voltammogram of <b>1</b> and <b>4a–e</b> .....                                          | S15 |
| 7. DFT calculated energy levels.....                                                              | S16 |
| 8. Thermogravimetric analysis of <b>4a–d</b> .....                                                | S17 |
| 9. DSC traces of <b>4a–d</b> (second scan) .....                                                  | S18 |

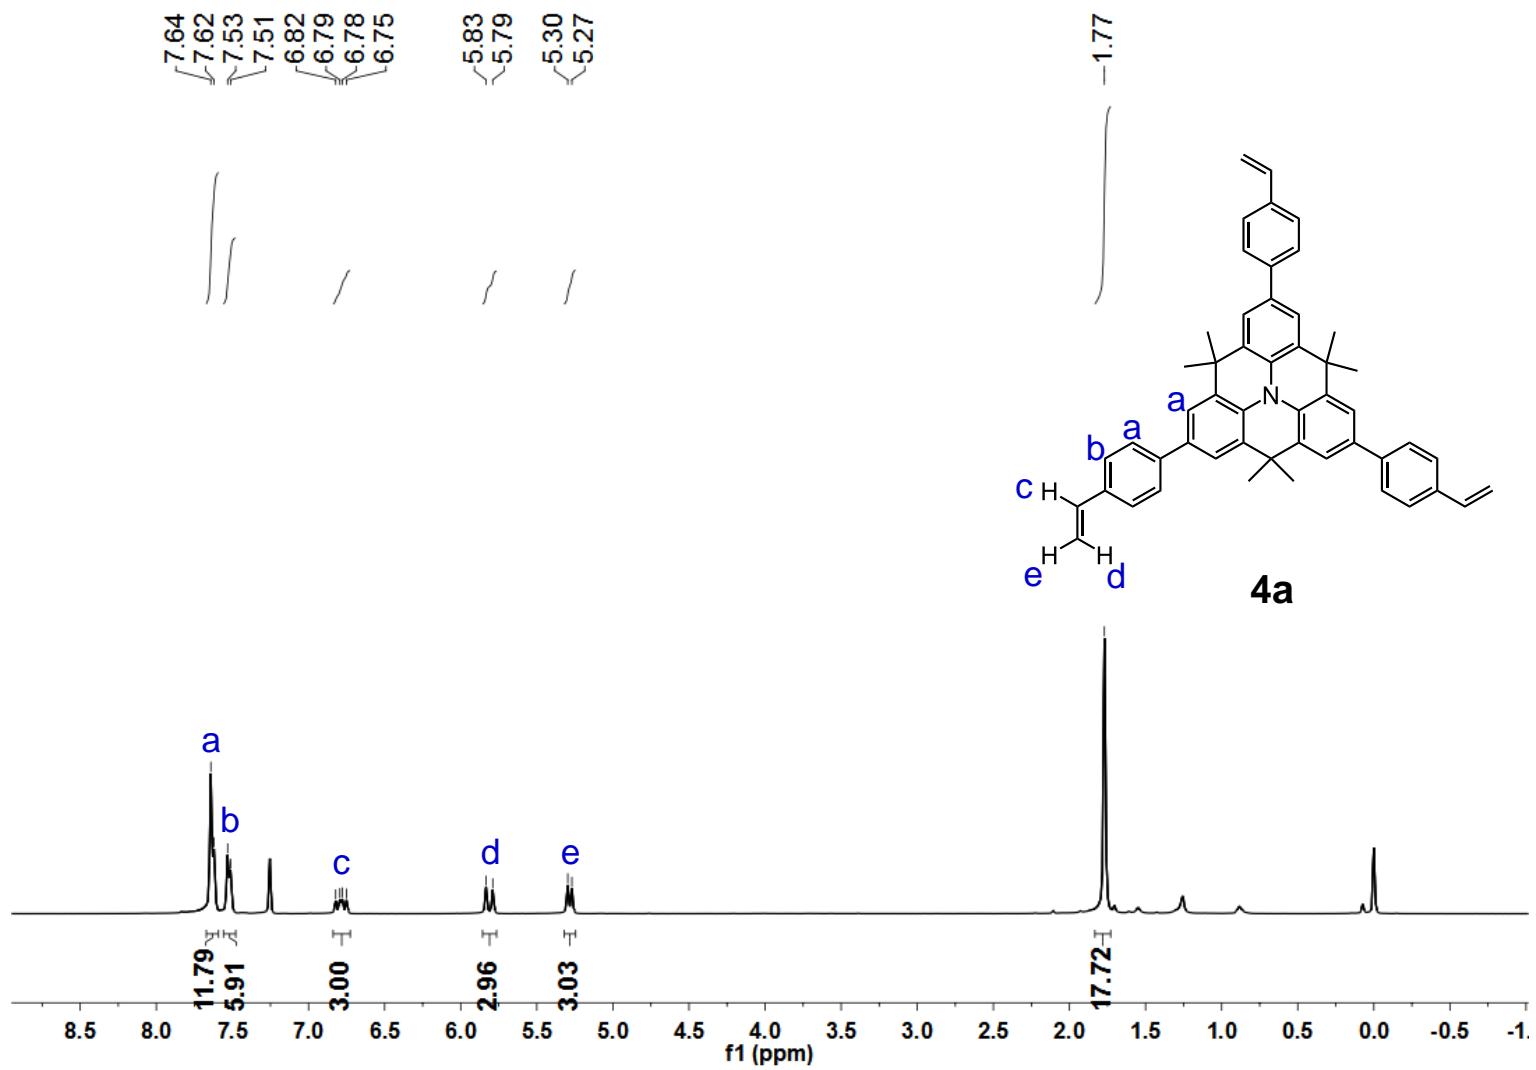

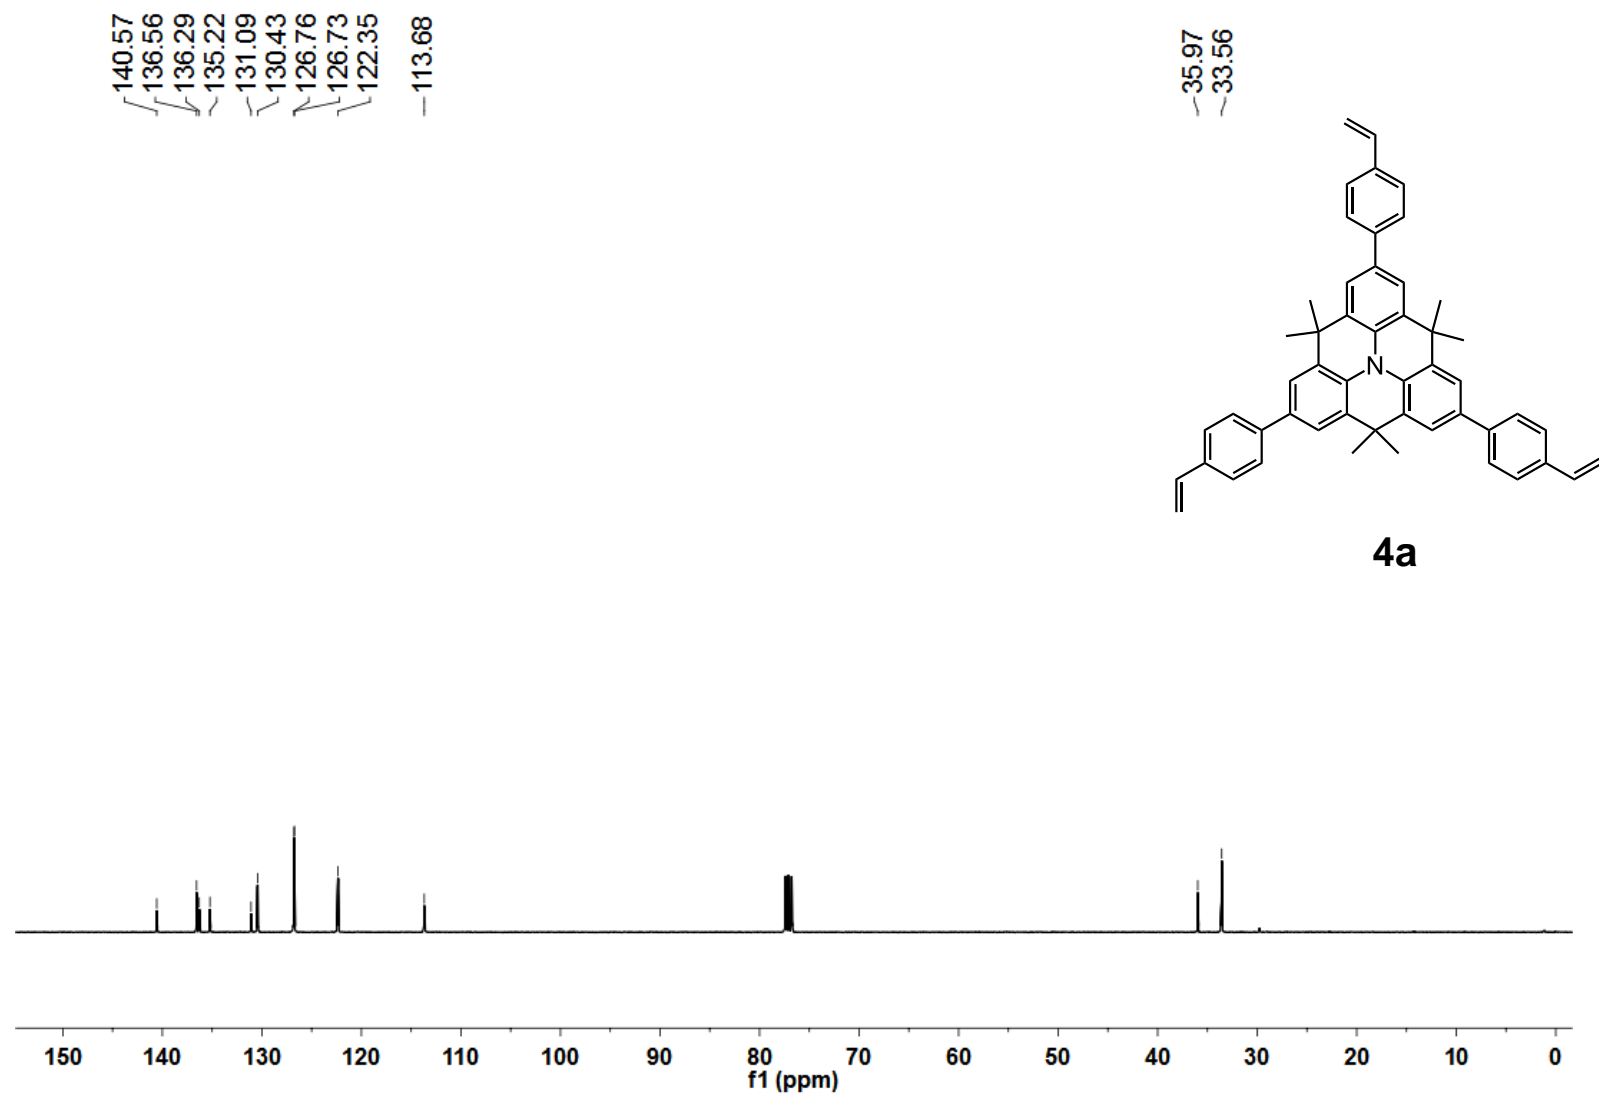

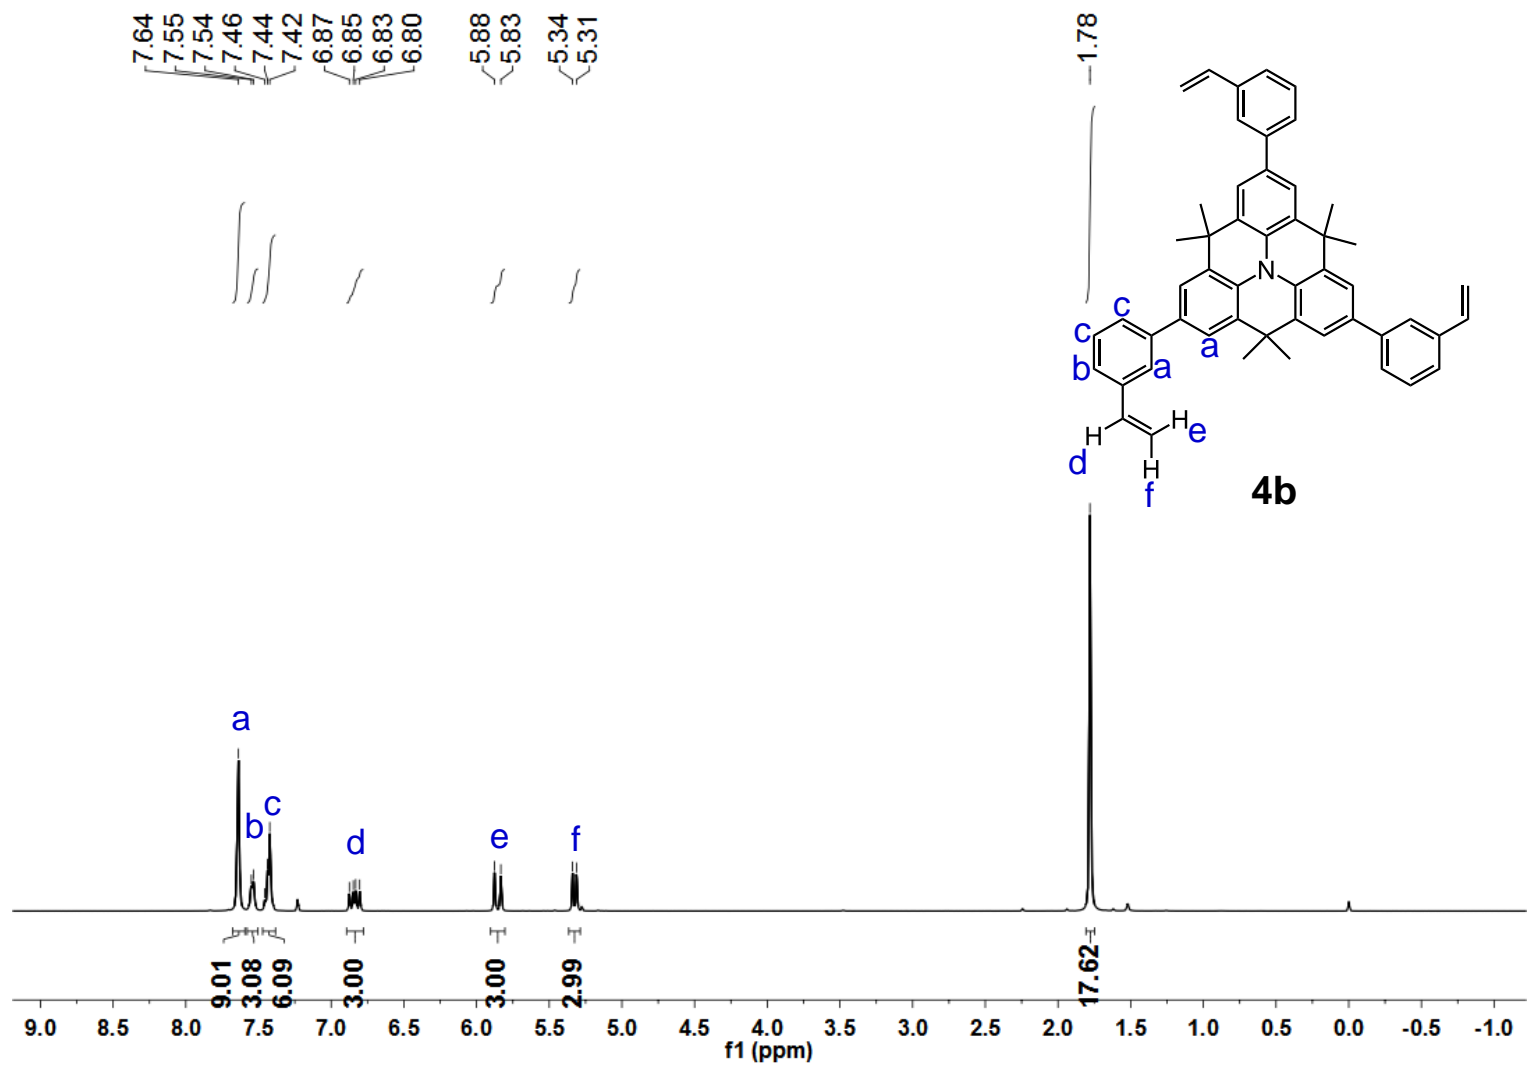



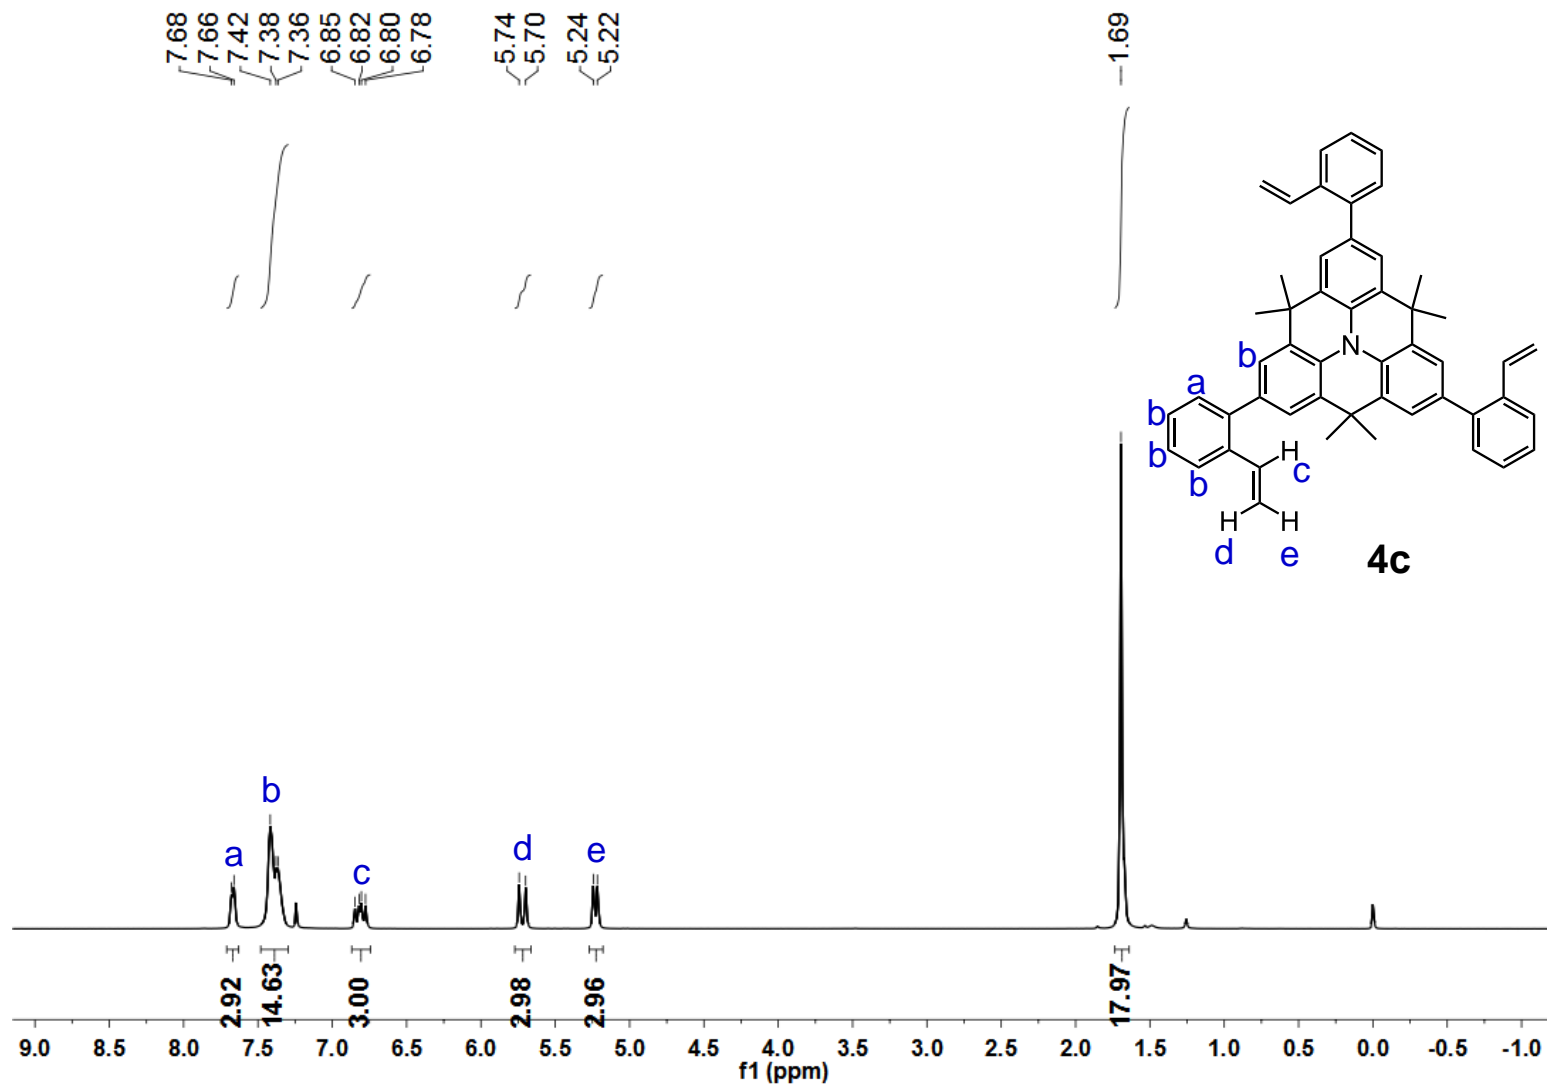

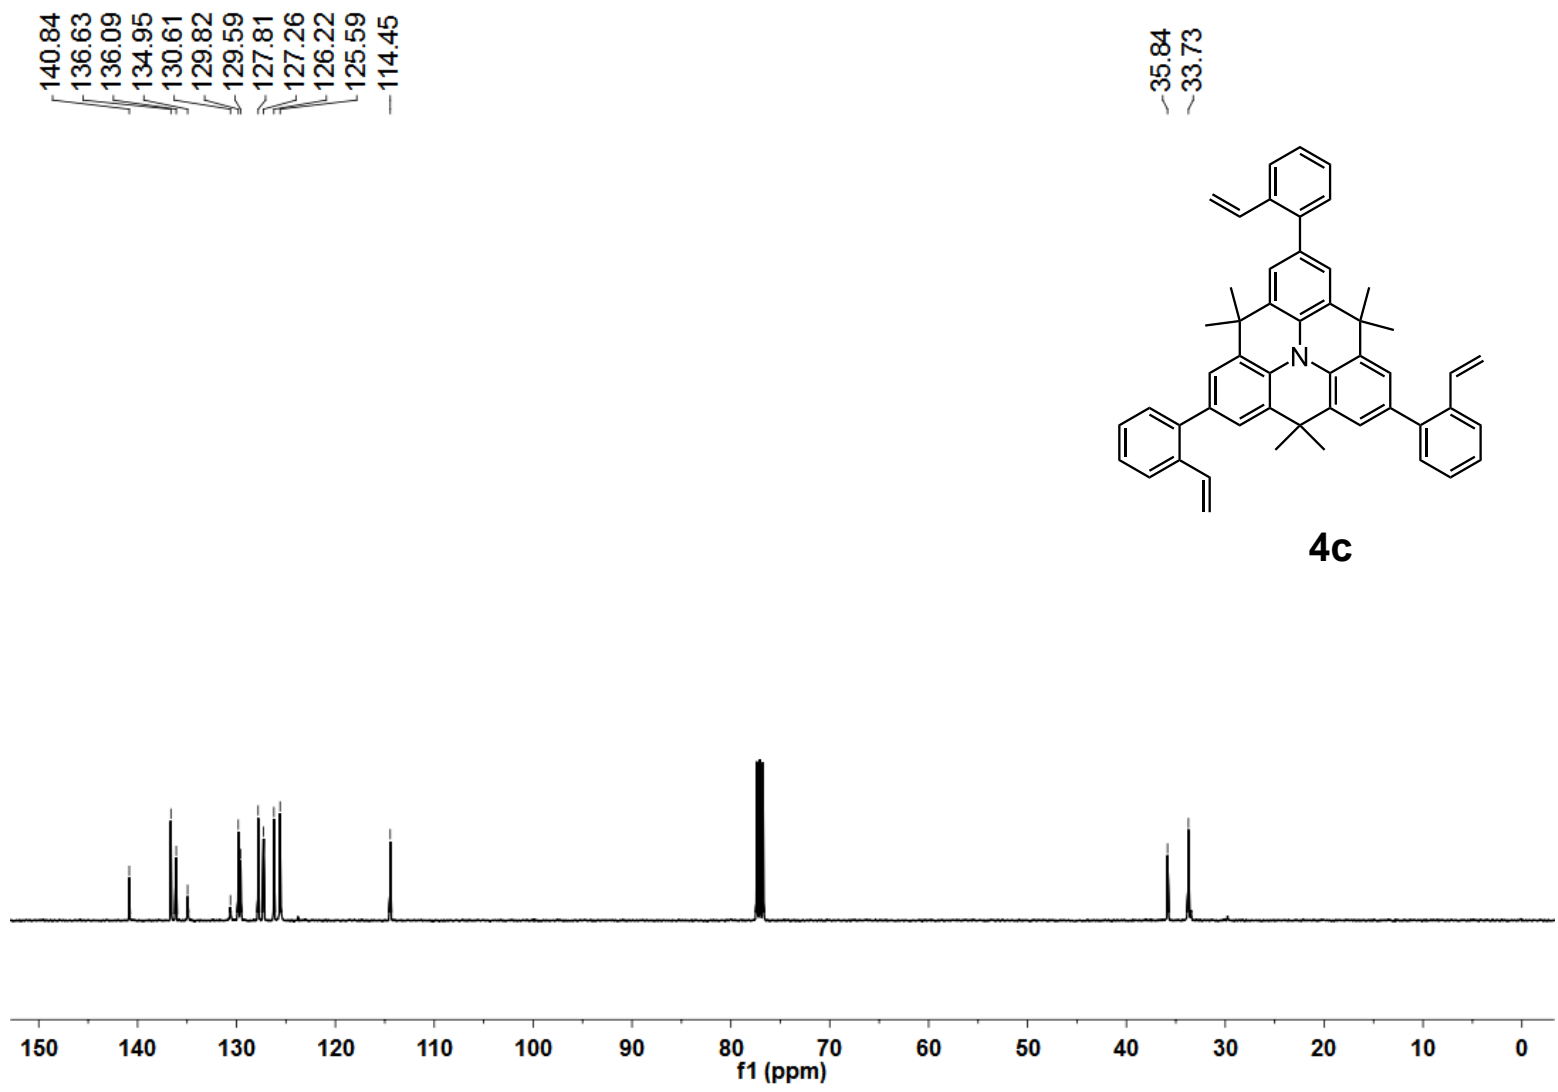

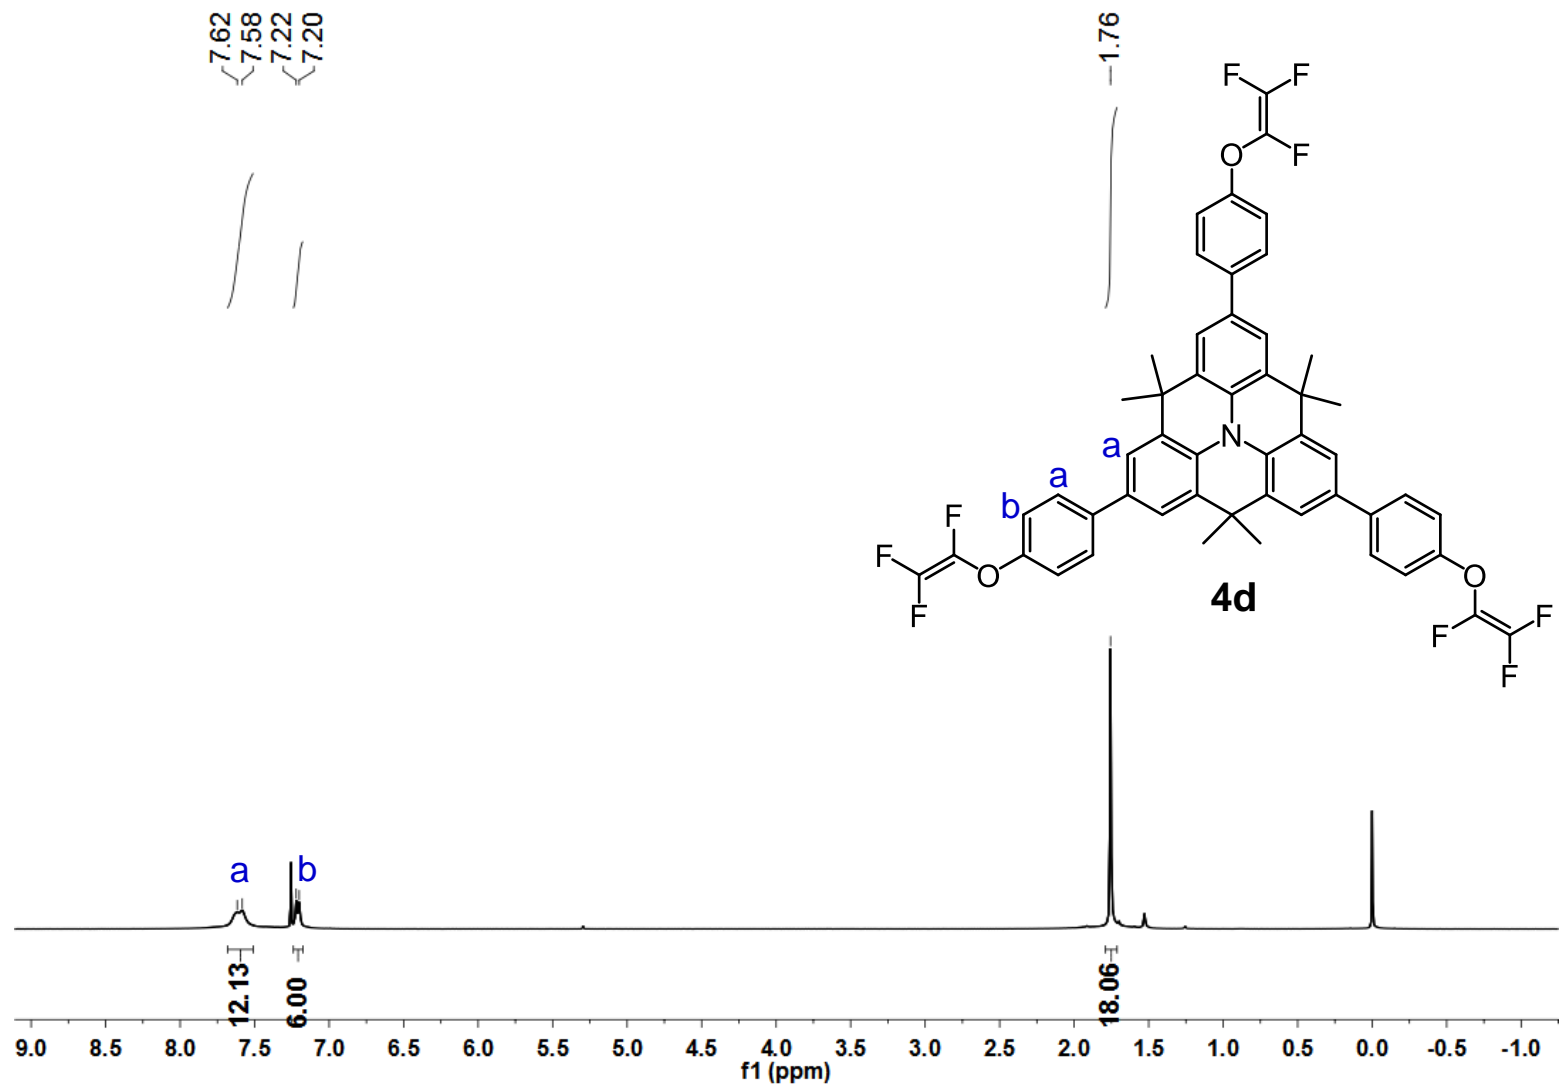



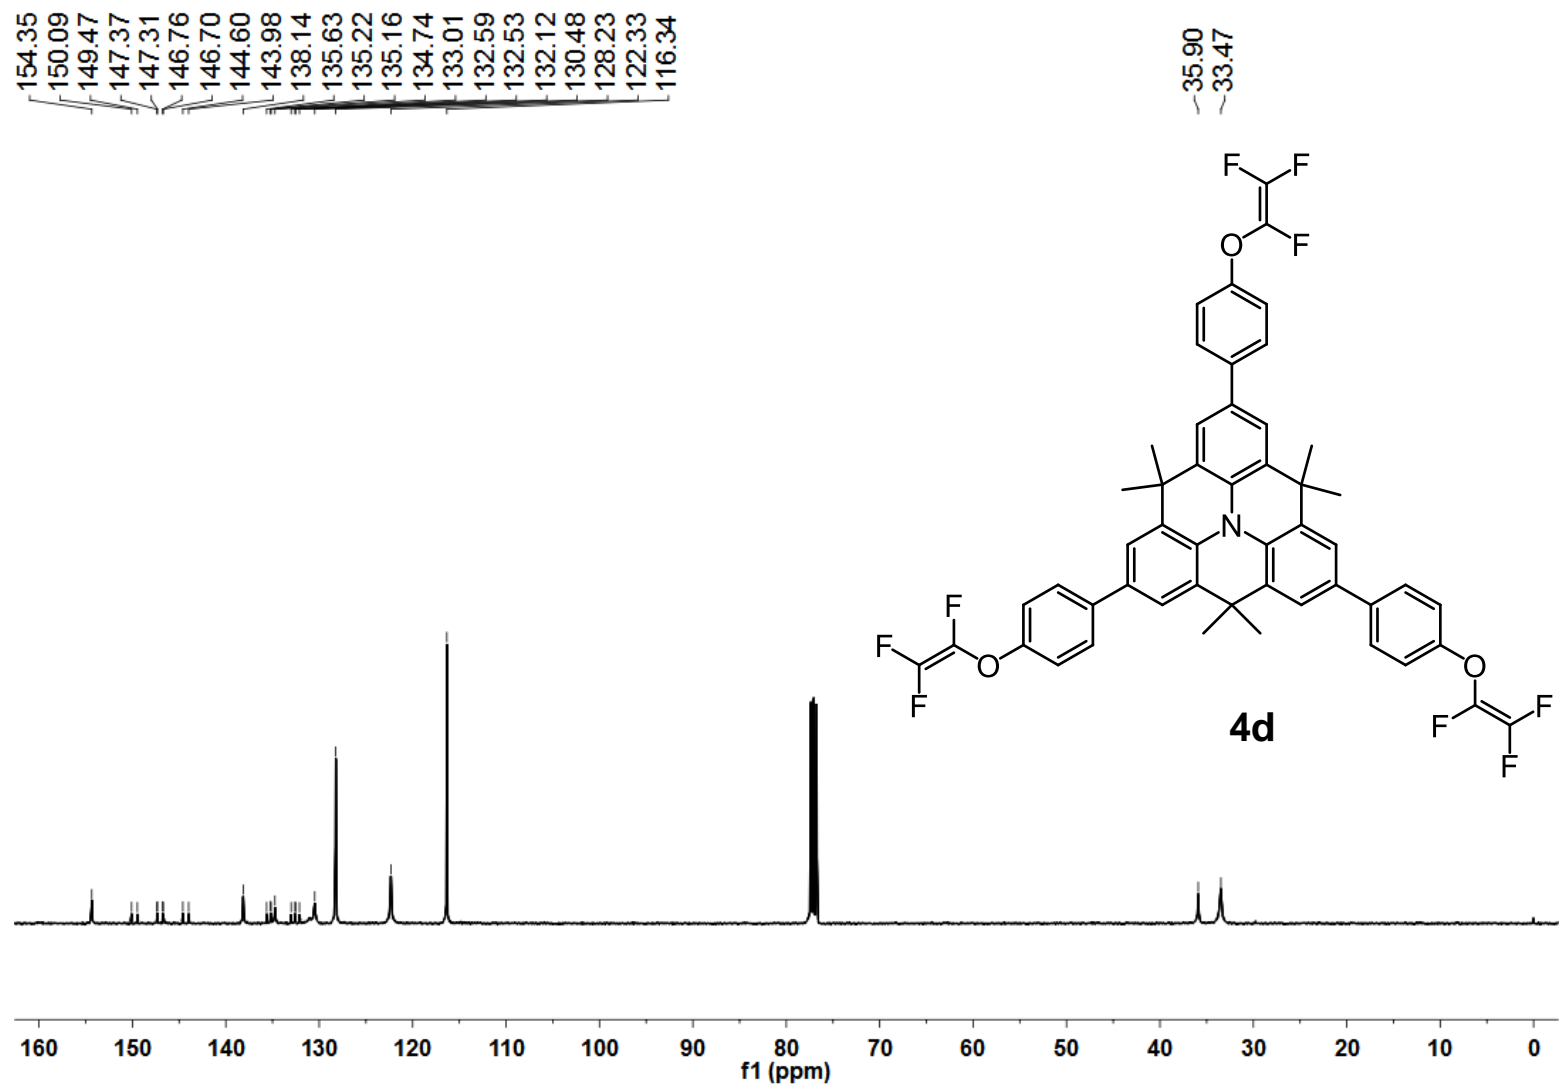

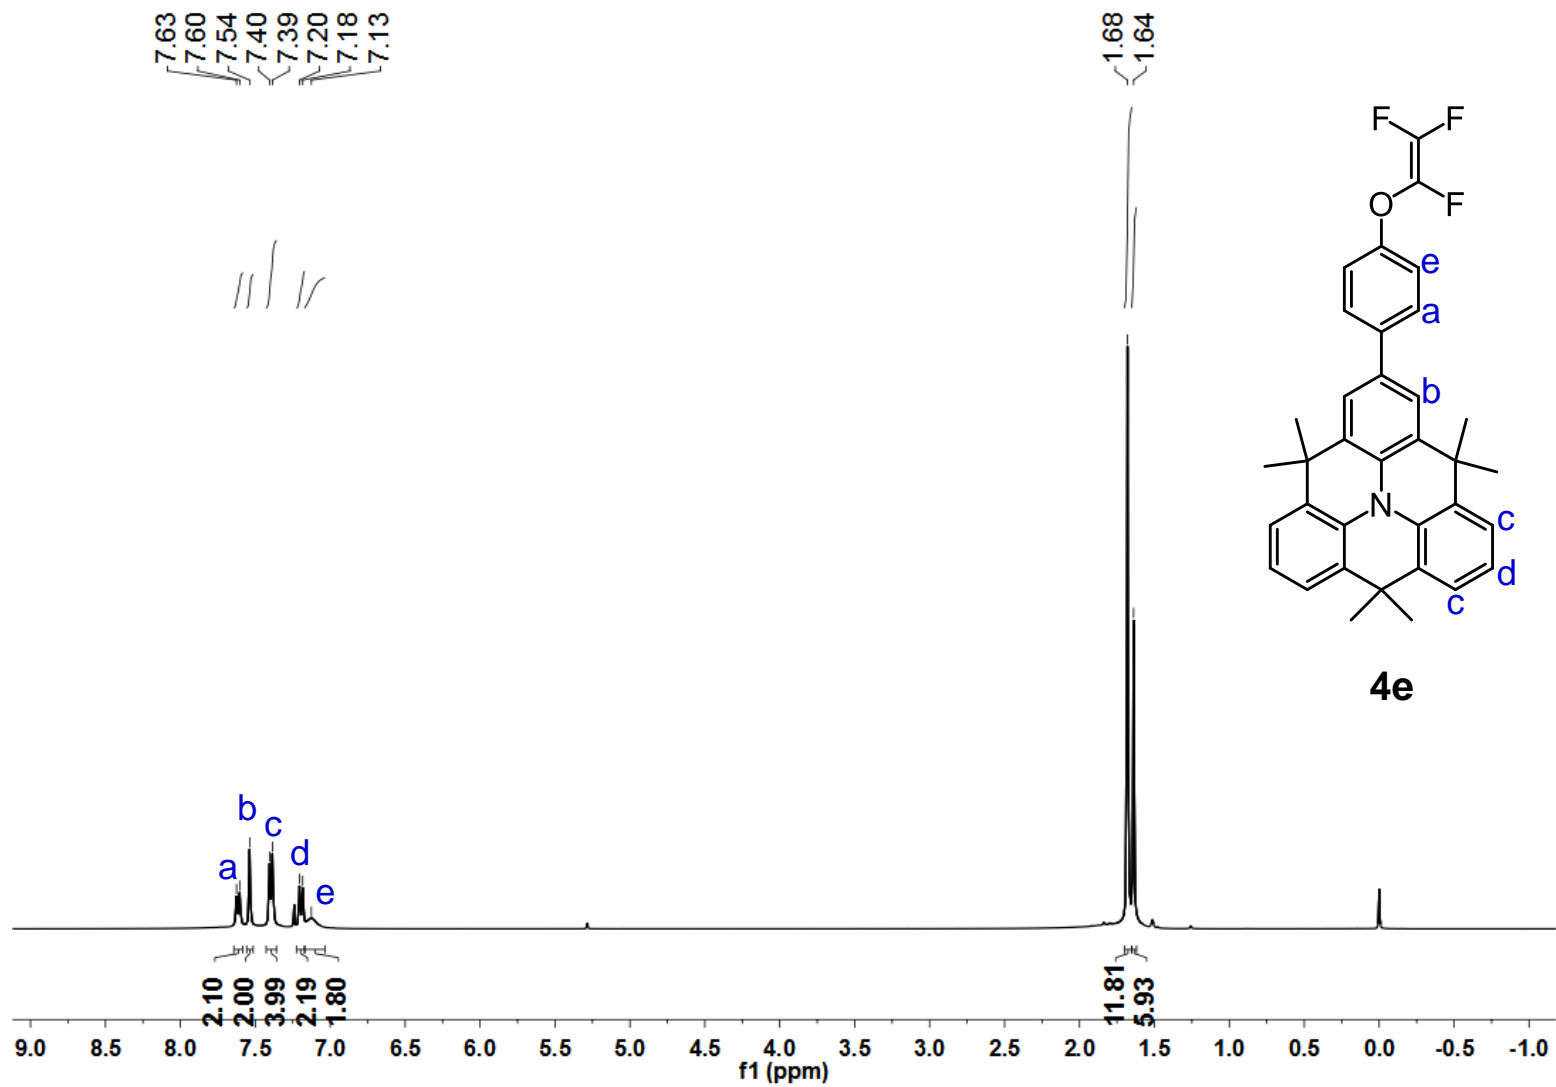

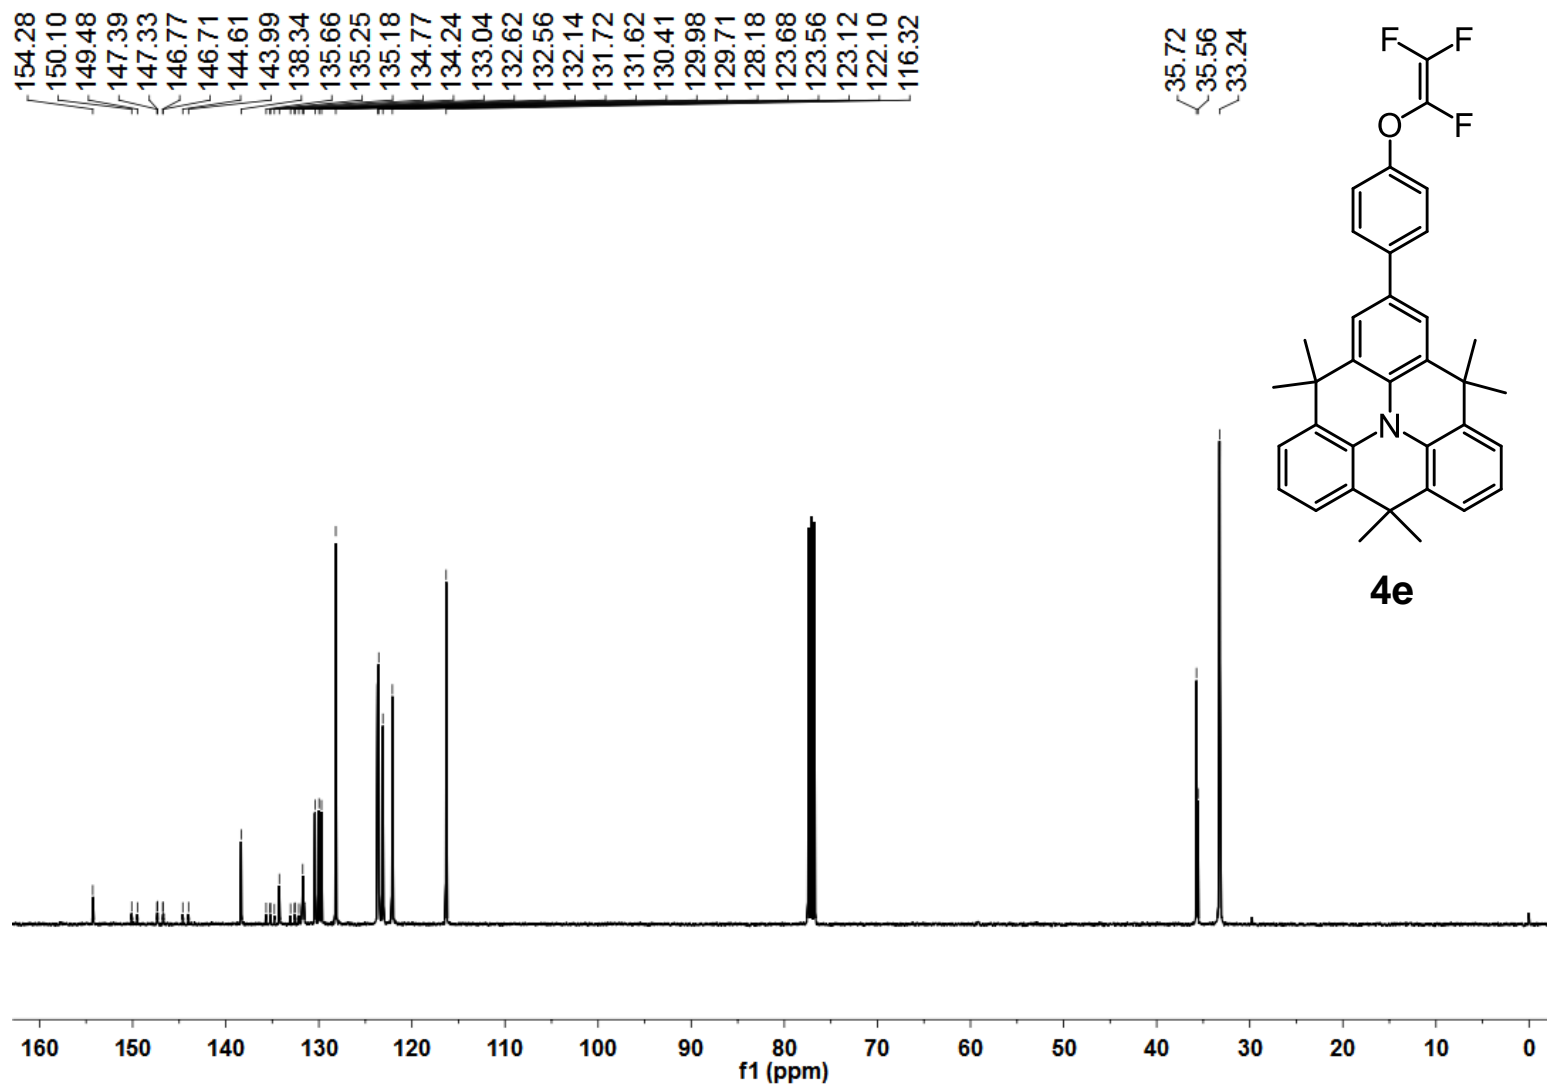

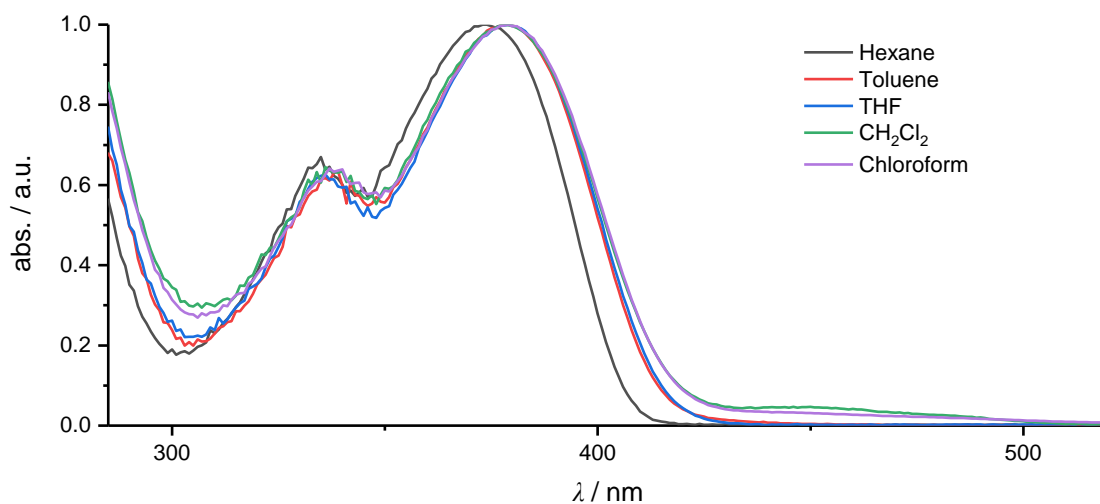

**Fig. S1** UV/Vis absorption spectra of **4a** in different solvents ( $1.0 \times 10^{-5}$  M).

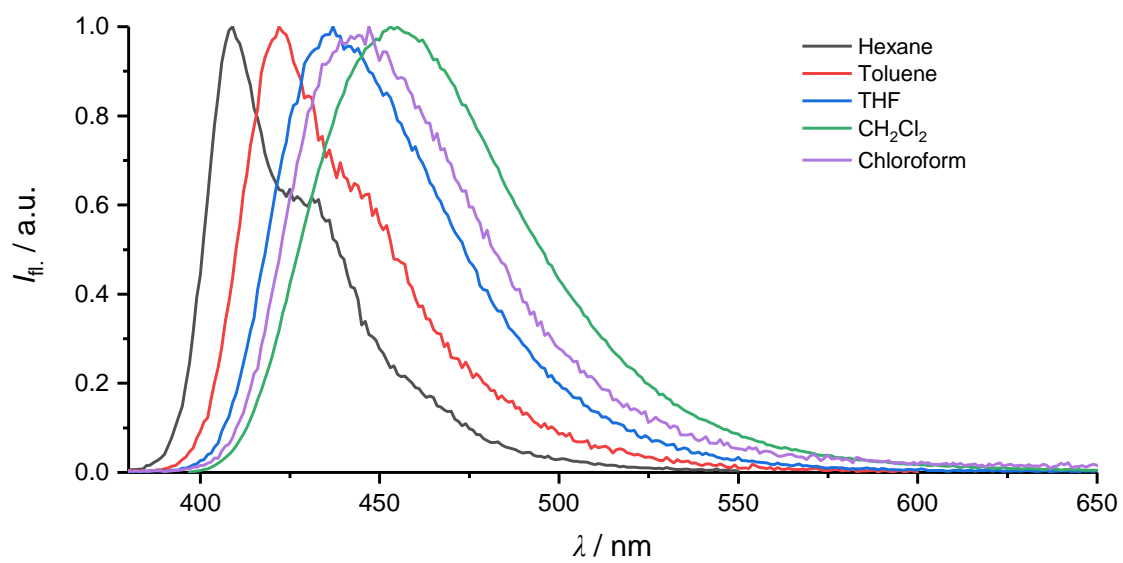

**Fig. S2** Fluorescence spectra of **4a** in different solvents ( $1.0 \times 10^{-5}$  M).  $\lambda_{ex} = 340$  nm.

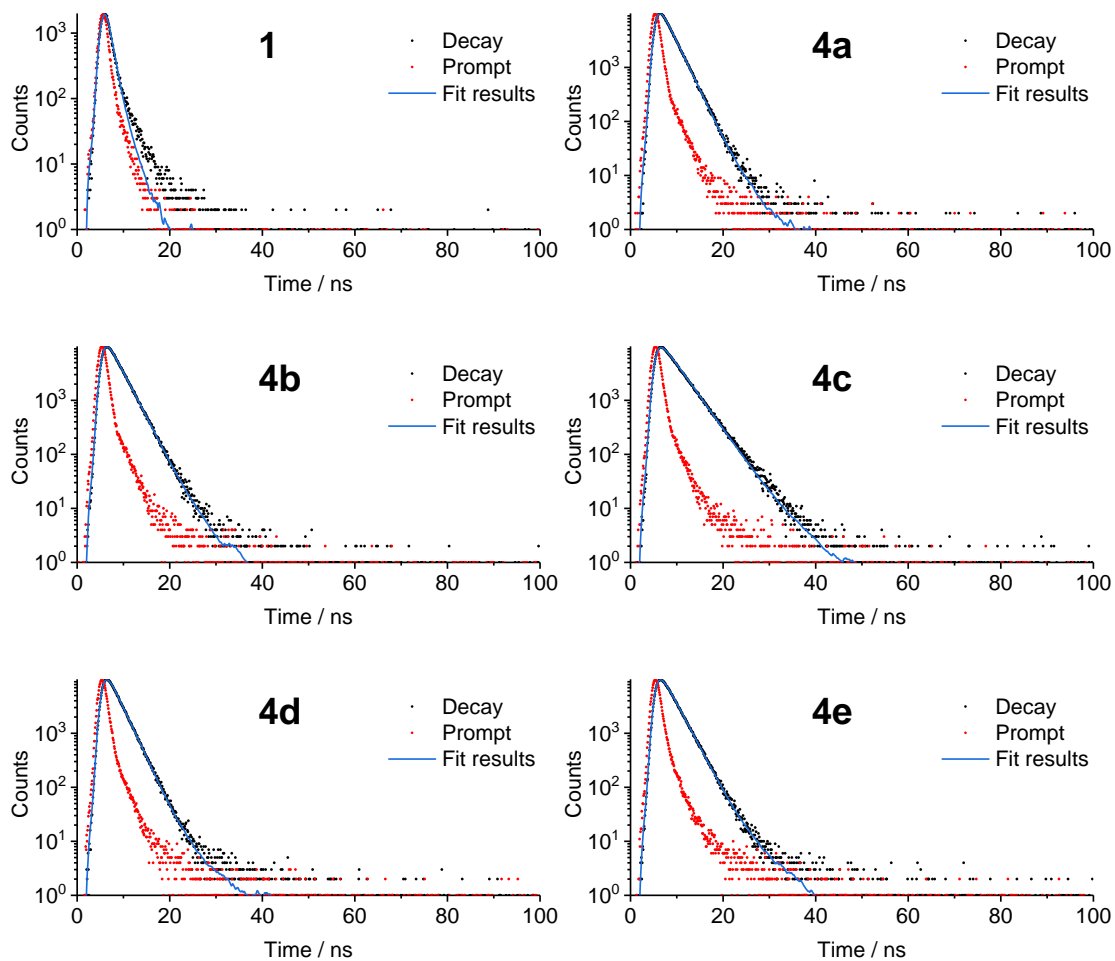

**Fig. S3** Fluorescence decay curves of **1** and **4a–e** in  $\text{CH}_2\text{Cl}_2$  ( $1.0 \times 10^{-5}$  M). **1**:  $\lambda_{\text{ex}} = 310$  nm, **4a–e**:  $\lambda_{\text{ex}} = 340$  nm. The decay curves are fitted with mono-exponential method.

**Table S1** The measured fluorescence lifetimes for **1** and **4a–e** in  $\text{CH}_2\text{Cl}_2$ .

| compound  | $\tau$ / ns | $\chi^2$ |
|-----------|-------------|----------|
| <b>1</b>  | 0.80        | 1.219    |
| <b>4a</b> | 2.22        | 0.946    |
| <b>4b</b> | 2.42        | 0.936    |
| <b>4c</b> | 3.48        | 1.107    |
| <b>4d</b> | 2.17        | 0.941    |
| <b>4e</b> | 2.48        | 0.968    |

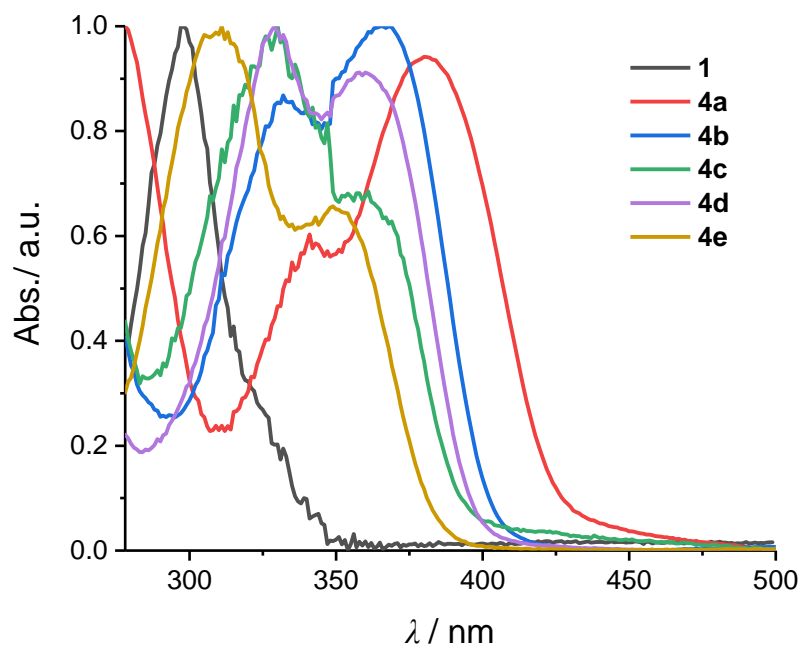

**Fig. S4** UV/Vis absorption spectra of compounds **1** and **4a–e** in spin-coated thin films (10 mg/mL in toluene, 4000 rpm, 30 s).

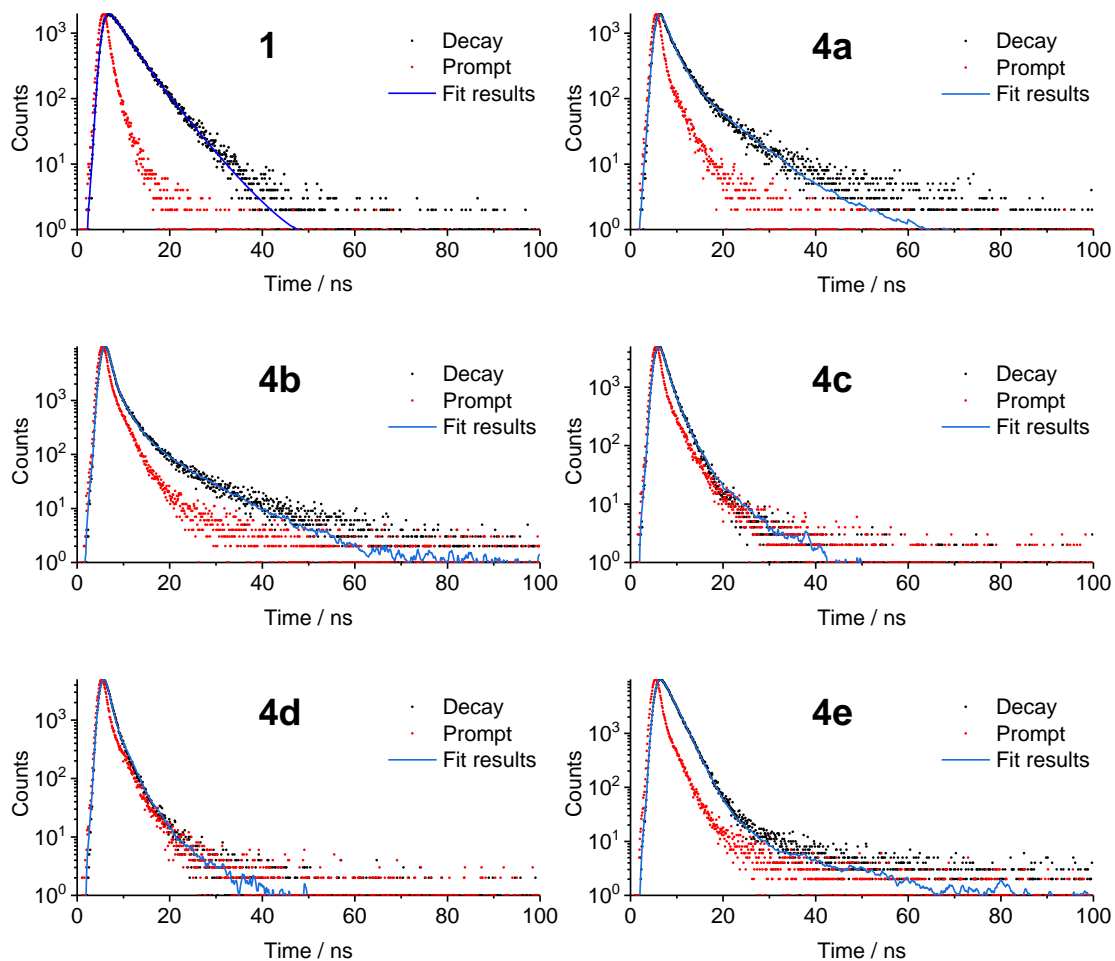

**Fig. S5** Fluorescence decay curves of **1** and **4a–e** in spin-coated thin films (10 mg/mL in toluene, 4000 rpm, 30 s). **1**:  $\lambda_{\text{ex}} = 310$  nm, **4a–e**:  $\lambda_{\text{ex}} = 340$  nm. The decay curves of **1**, **4a** and **4b** are fitted with double-exponential method. The decay curves of **4c–e** are fitted with mono-exponential method.

**Table S2** The measured fluorescence lifetimes for **1** and **4a–e** in thin films.

| compound  | $\tau_1$ / ns | $\tau_2$ / ns | $\tau$ | $\chi^2$ |
|-----------|---------------|---------------|--------|----------|
| <b>1</b>  | 2.63 (49.03%) | 5.29 (50.97%) | 3.98   | 0.918    |
| <b>4a</b> | 1.42 (77.26%) | 7.67 (22.74%) | 2.84   | 1.145    |
| <b>4b</b> | 0.55 (91.03%) | 8.52 (8.97%)  | 1.26   | 1.211    |
| <b>4c</b> | 0.90          | /             | 0.90   | 1.115    |
| <b>4d</b> | 0.61          | /             | 0.61   | 1.010    |
| <b>4e</b> | 1.83          | /             | 1.83   | 1.061    |

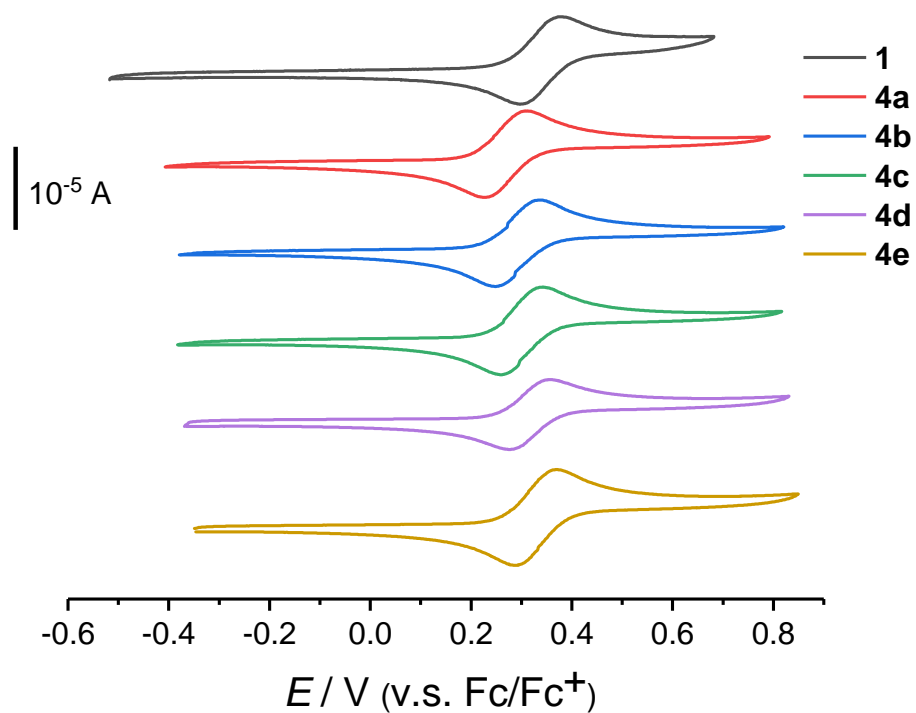

**Fig. S6** Cyclic voltammograms of compounds **1** and **4a–e** in  $CH_2Cl_2$  ( $5.0 \times 10^{-4}$  M). The scan rate is 50 mV/s. Ferrocene was used as internal reference.



**Table S3** The HOMO and LUMO levels by DFT calculation<sup>a</sup>

|           | HOMO / eV | LUMO / eV | $\Delta E^b$ / eV |
|-----------|-----------|-----------|-------------------|
| <b>4a</b> | -5.12     | -1.47     | 3.65              |
| <b>4b</b> | -5.16     | -1.30     | 3.86              |
| <b>4c</b> | -5.18     | -1.17     | 4.01              |
| <b>4d</b> | -5.34     | -1.28     | 4.06              |
| <b>4e</b> | -5.26     | -1.04     | 4.22              |

<sup>a</sup> B3LYP/6-311G(d) basis set was used. The calculations were performed with the GAUSSIAN 09W program. <sup>b</sup>  $\Delta E = \text{LUMO} - \text{HOMO}$ .

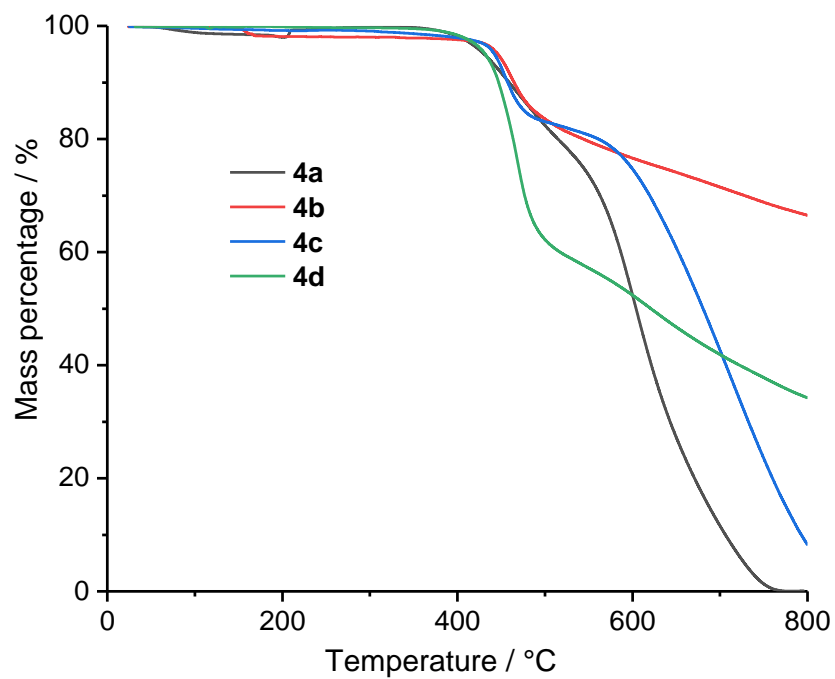

**Fig. S7** Thermogravimetric traces for DTPAs **4a–d** with heating rate of 10 °C/min.

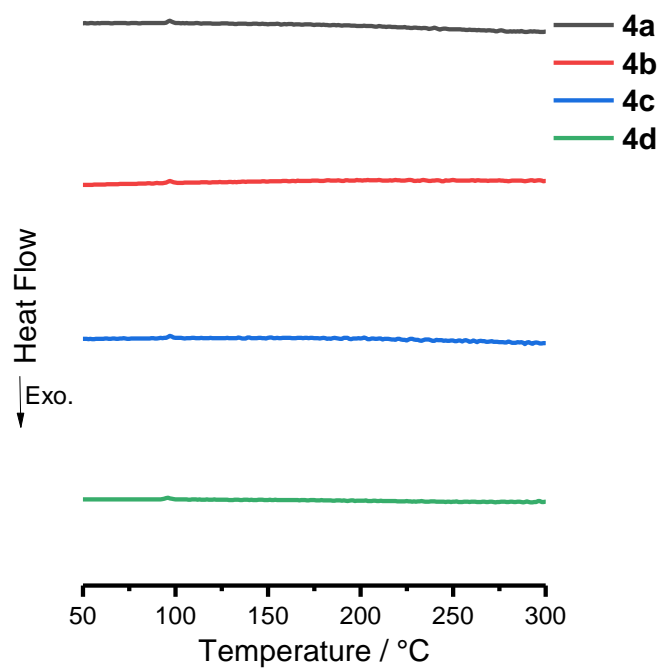

**Fig. S8** DSC traces for DTPAs **4a–d** with heating rate of 10 °C/min for the second heating scan.
